# Supplementary material
Source: PubMed Central journal article supplement (PMC9992158)
Supplement: NIHMS1865511-supplement-2.pdf [file NIHMS1865511-supplement-2.pdf]

Supplemental Table S1. Descriptive characteristics of study populations in the GECCO and CORECT model building dataset

| <b>Study Name</b>                                                    | <b>Short Name</b> | <b>Design</b> | <b>Country</b> | <b>Cases</b> | <b>Controls</b> | <b>Mean Age (range)</b> | <b>Female (%)</b> |
|----------------------------------------------------------------------|-------------------|---------------|----------------|--------------|-----------------|-------------------------|-------------------|
| <b>Hawaii Colorectal Cancer Studies 2 and 3</b>                      | Colo2&3           | Case/Control  | U.S.           | 48           | 70              | 64 (38-84)              | 49                |
| <b>Cancer Prevention Study II</b>                                    | CPS2              | Cohort Study  | U.S.           | 279          | 275             | 75 (58-94)              | 49                |
| <b>Darmkrebs: Chancen der Verhütung durch Screening</b>              | DACHS             | Case/Control  | Germany        | 1187         | 1092            | 68 (33-99)              | 40                |
| <b>Diet, Activity and Lifestyle Study</b>                            | DALS              | Case/Control  | U.S.           | 579          | 570             | 65 (30-79)              | 44                |
| <b>Health Professionals Follow-up Study</b>                          | HPFS              | Cohort Study  | U.S.           | 74           | 57              | 70 (50-89)              | 0                 |
| <b>Kentucky Case-Control Study</b>                                   | Kentucky          | Case/Control  | U.S.           | 505          | 586             | 65 (21-95)              | 53                |
| <b>Melbourne Collaborative Cohort Study</b>                          | MCCS              | Cohort Study  | Australia      | 125          | 226             | 68 (45-87)              | 48                |
| <b>Multi-Ethnic Cohort</b>                                           | MEC               | Cohort Study  | U.S.           | 120          | 187             | 70 (47-89)              | 46                |
| <b>Molecular Epidemiology of Colorectal Cancer</b>                   | MECC              | Case/Control  | Israel         | 540          | 393             | 72 (25-95)              | 48                |
| <b>Newfoundland Case-Control Study</b>                               | NFCCR             | Case/Control  | Canada         | 99           | 234             | 62 (23-76)              | 38                |
| <b>Nurses' Health Study</b>                                          | NHS               | Cohort Study  | U.S.           | 118          | 273             | 66 (46-83)              | 100               |
| <b>Prostate, Lung, Colorectal and Ovarian Cancer Screening Trial</b> | PLCO              | Cohort Study  | U.S.           | 426          | 414             | 70 (55-87)              | 42                |
| <b>VITamins And Lifestyle</b>                                        | VITAL             | Cohort Study  | U.S.           | 151          | 138             | 70 (51-83)              | 49                |
| <b>Women's Health Initiative</b>                                     | WHI               | Cohort Study  | U.S.           | 624          | 776             | 72 (52-89)              | 100               |
