# Supplementary material
Source: PubMed Central journal article supplement (PMC9992158)
Supplement: NIHMS1865511-supplement-3.pdf [file NIHMS1865511-supplement-3.pdf]

Supplemental Table S2. Descriptive statistics of GERA study participants by racial/ethnic groups and sex

| Risk factors                                                 | Race/ethnicity-stratified     |                    |                       |                     | Sex-stratified     |                    |
|--------------------------------------------------------------|-------------------------------|--------------------|-----------------------|---------------------|--------------------|--------------------|
|                                                              | African American <sup>a</sup> | Asian <sup>a</sup> | European <sup>a</sup> | Latinx <sup>a</sup> | Men                | Women              |
| <b>Total N</b>                                               | 2,781                         | 6,132              | 66,282                | 5,502               | 37,130             | 48,091             |
| <b>Women (%)</b>                                             | 1531 (55.1%)                  | 3280 (53.5%)       | 38,268 (57.7%)        | 3205 (58.3%)        | --                 | --                 |
| <b>With endoscopy history<sup>b</sup> (%)</b>                | 1593 (57.3%)                  | 3222 (52.5%)       | 38,104 (57.5%)        | 2695 (49.0%)        | 22,105 (59.5%)     | 29029 (60.4%)      |
| <b>With family history (%)</b>                               | 285 (10.2%)                   | 567 (9.2%)         | 6534 (9.9%)           | 490 (8.9%)          | 3108 (8.4%)        | 5194 (10.8%)       |
| <b>Age at study entry: Median (min-max, Q1, Q3)</b>          | 60 (41-85, 53, 68)            | 58 (40-85, 51, 67) | 63 (40-85, 56, 71)    | 58 (40-85, 50, 67)  | 63 (40-85, 55, 70) | 62 (40-85, 54, 70) |
| <b>PRS-percentile distribution: Median (min-max, Q1, Q3)</b> | 49 (0-99, 23, 75)             | 41 (0-99, 20, 66)  | 51 (0-99, 26, 75)     | 40 (0-99, 18, 67)   | 49 (0-99, 24, 75)  | 50 (0-99, 25, 75)  |

a. European-ancestry participants are defined based on the principal component analysis of genotyping data. African American, Asian, and Latinx are defined based on self-reported racial/ethnic information. The numbers in 'Total N' do not add up to the total number of the GERA because the genetically-defined Europeans excluded participants who self-identified as non-Hispanic white but did not cluster with the European-ancestry participants in the principal component analysis.

b. Endoscopy history was restricted to within 10-year prior to study entry.
