# Supplementary material
Source: PubMed Central journal article supplement (PMC9992158)
Supplement: NIHMS1865511-supplement-4.pdf [file NIHMS1865511-supplement-4.pdf]

Supplemental Table S3. Comparison on characteristics between GECCO/CORECT study and GERA Europeans-ancestry participants.

|                                 | <b>GECCO/CORECT</b> | <b>GERA</b>        |
|---------------------------------|---------------------|--------------------|
| <b>N</b>                        | 20,040              | 66,282             |
| <b>Age at study entry</b>       |                     |                    |
| <b>Median (min-max, Q1, Q3)</b> | 66 (20-99, 60, 72)  | 63 (40-85, 56, 71) |
| <b>Missing</b>                  | 4                   | --                 |
| <b>Sex</b>                      |                     |                    |
| <b>Female</b>                   | 10,989 (54.8%)      | 38,268 (57.7%)     |
| <b>Male</b>                     | 9,051 (45.2%)       | 28,014 (42.3%)     |
| <b>Family history</b>           |                     |                    |
| <b>No</b>                       | 15,919 (86.2%)      | 59,748 (90.1%)     |
| <b>Yes</b>                      | 2,542 (13.8%)       | 6,534 (9.9%)       |
| <b>Missing</b>                  | 1,579               | --                 |
| <b>Endoscopy history</b>        |                     |                    |
| <b>No</b>                       | 14,417 (71.9%)      | 25,858 (39.0%)     |
| <b>Yes</b>                      | 5,623 (28.1%)       | 40,424 (61.0%)     |
