# Supplementary material
Source: PubMed Central journal article supplement (PMC9992158)
Supplement: NIHMS1865511-supplement-5.pdf [file NIHMS1865511-supplement-5.pdf]

Supplemental Table S4. List of 140 CRC-associated loci and associations with colorectal cancer in European-ancestry population

| <b>LOCUS</b>   | <b>RSID</b> | <b>VARIANT</b>  | <b>CHR</b> | <b>POS</b> | <b>RISK ALLELE</b> | <b>RAF</b> | <b>BETA</b> |
|----------------|-------------|-----------------|------------|------------|--------------------|------------|-------------|
| <b>1p34.3</b>  | rs4360494   | 1:38455891_G/C  | 1          | 38455891   | G                  | 0.4539     | 0.0379      |
| <b>1p32.3</b>  | rs12144319  | 1:55246035_T/C  | 1          | 55246035   | C                  | 0.2548     | 0.0661      |
| <b>1p36.12</b> | rs72647484  | 1:22587728_T/C  | 1          | 22587728   | T                  | 0.9107     | 0.0504      |
| <b>1p31.3</b>  | rs7542665   | 1:62673037_T/C  | 1          | 62673037   | C                  | 0.273      | 0.0334      |
| <b>1q25.3</b>  | rs6678517   | 1:183002639_A/G | 1          | 183002639  | A                  | 0.5898     | 0.073       |
| <b>1q41</b>    | rs17011141  | 1:222112634_A/G | 1          | 222112634  | G                  | 0.2087     | 0.0877      |
| <b>2q24.2</b>  | rs448513    | 2:159964552_T/C | 2          | 159964552  | C                  | 0.326      | 0.0054      |
| <b>2q33.1</b>  | rs11884596  | 2:199612407_T/C | 2          | 199612407  | C                  | 0.3823     | 0.0342      |
| <b>2q33.1</b>  | rs983402    | 2:199781586_T/C | 2          | 199781586  | T                  | 0.3312     | 0.0622      |
| <b>2p16.3</b>  | rs7606562   | 2:48686695_T/A  | 2          | 48686695   | T                  | 0.813      | 0.0414      |
| <b>2q11.2</b>  | rs11692435  | 2:98275354_G/A  | 2          | 98275354   | G                  | 0.9        | 0.0492      |
| <b>2q35</b>    | rs3731861   | 2:219191256_T/C | 2          | 219191256  | T                  | 0.6295     | 0.0613      |
| <b>3q22.2</b>  | rs10049390  | 3:133701119_G/A | 3          | 133701119  | A                  | 0.7353     | 0.0455      |
| <b>3q13.2</b>  | rs13086367  | 3:112903888_A/G | 3          | 112903888  | A                  | 0.5262     | 0.0463      |
| <b>3q13.2</b>  | rs72942485  | 3:112999560_G/A | 3          | 112999560  | G                  | 0.9802     | 0.0545      |
| <b>3p21.1</b>  | rs9831861   | 3:53088285_T/G  | 3          | 53088285   | G                  | 0.59       | 0.0294      |
| <b>3p22.1</b>  | rs35470271  | 3:40915239_A/G  | 3          | 40915239   | G                  | 0.154      | 0.0994      |
| <b>3q13.2</b>  | rs12635946  | 3:112916918_C/T | 3          | 112916918  | C                  | 0.62       | 0.0334      |
| <b>3q22.2</b>  | rs113569514 | 3:133748789_T/C | 3          | 133748789  | T                  | 0.62       | 0.0414      |
| <b>3q26.2</b>  | rs9876206   | 3:169517436_C/T | 3          | 169517436  | C                  | 0.7507     | 0.0453      |
| <b>3p14.1</b>  | rs6781752   | 3:66365163_G/A  | 3          | 66365163   | A                  | 0.205      | 0.0597      |
| <b>4q31.21</b> | rs11727676  | 4:145659064_T/C | 4          | 145659064  | C                  | 0.098      | 0.0093      |
| <b>4q24</b>    | rs1391441   | 4:106128760_G/A | 4          | 106128760  | A                  | 0.672      | 0.0148      |
| <b>4q22.2</b>  | rs13149359  | 4:94938618_C/A  | 4          | 94938618   | A                  | 0.3663     | 0.052       |
| <b>5p13.1</b>  | rs7708610   | 5:40102443_G/A  | 5          | 40102443   | A                  | 0.3564     | 0.0384      |
| <b>5p15.33</b> | rs78368589  | 5:1240204_C/T   | 5          | 1240204    | T                  | 0.0597     | 0.0786      |
| <b>5q21.1</b>  | rs145364999 | 5:98206082_T/A  | 5          | 98206082   | T                  | 0.9969     | 0.3496      |

|                |             |                 |   |           |   |        |        |
|----------------|-------------|-----------------|---|-----------|---|--------|--------|
| <b>5p15.33</b> | rs2735940   | 5:1296486_A/G   | 5 | 1296486   | G | 0.4952 | 0.0865 |
| <b>5p13.1</b>  | rs12514517  | 5:40280076_G/A  | 5 | 40280076  | A | 0.288  | 0.1013 |
| <b>5q22.2</b>  | rs755229494 | 5:112097351_A/G | 5 | 112097351 | G | 0.0011 | 0.6286 |
| <b>5q23.2</b>  | rs12659017  | 5:125988175_G/A | 5 | 125988175 | G | 0.232  | 0.0374 |
| <b>5q31.1</b>  | rs4976270   | 5:134467220_C/T | 5 | 134467220 | C | 0.5501 | 0.0693 |
| <b>6p12.1</b>  | rs13204733  | 6:55566108_A/G  | 6 | 55566108  | G | 0.141  | 0.0643 |
| <b>6p21.33</b> | rs116685461 | 6:31315512_G/A  | 6 | 31315512  | G | 0.8755 | 0.0655 |
| <b>6p21.32</b> | rs9271695   | 6:32593080_A/G  | 6 | 32593080  | G | 0.7954 | 0.0889 |
| <b>6p21.33</b> | rs2516420   | 6:31449620_C/T  | 6 | 31449620  | C | 0.9263 | 0.1091 |
| <b>6p21.33</b> | rs116353863 | 6:31010185_T/C  | 6 | 31010185  | C | 0.0165 | 0.1202 |
| <b>6p21.31</b> | rs16878812  | 6:35569562_A/G  | 6 | 35569562  | A | 0.8861 | 0.0778 |
| <b>6p21.2</b>  | rs9470361   | 6:36623379_G/A  | 6 | 36623379  | A | 0.2488 | 0.054  |
| <b>6p12.1</b>  | rs62404966  | 6:55712124_C/T  | 6 | 55712124  | C | 0.7623 | 0.0724 |
| <b>6p21.33</b> | rs3131043   | 6:30758466_A/G  | 6 | 30758466  | G | 0.43   | 0.0294 |
| <b>6p24.1</b>  | rs2070699   | 6:12292772_G/T  | 6 | 12292772  | T | 0.48   | 0.0294 |
| <b>6p22.1</b>  | rs1476570   | 6:29809860_G/A  | 6 | 29809860  | A | 0.376  | 0.0492 |
| <b>6p21.32</b> | rs3830041   | 6:32191339_C/T  | 6 | 32191339  | T | 0.14   | 0.0645 |
| <b>6q21</b>    | rs6928864   | 6:105966894_C/A | 6 | 105966894 | C | 0.91   | 0.0531 |
| <b>6p21.1</b>  | rs62396735  | 6:41702582_C/T  | 6 | 41702582  | C | 0.2908 | 0.033  |
| <b>7p13</b>    | rs12672022  | 7:45136423_T/C  | 7 | 45136423  | T | 0.8345 | 0.0067 |
| <b>7p12.3</b>  | rs80077929  | 7:46094089_C/T  | 7 | 46094089  | T | 0.1107 | 0.0093 |
| <b>7p12.3</b>  | rs10951878  | 7:46926695_C/T  | 7 | 46926695  | C | 0.91   | 0.0531 |
| <b>7p12.3</b>  | rs3801081   | 7:47511161_A/G  | 7 | 47511161  | G | 0.49   | 0.0253 |
| <b>8q24.21</b> | rs7013278   | 8:128414892_T/C | 8 | 128414892 | T | 0.3761 | 0.0091 |
| <b>8q24.21</b> | rs4313119   | 8:128571855_G/T | 8 | 128571855 | G | 0.7486 | 0.0518 |
| <b>8q23.3</b>  | rs16892766  | 8:117630683_A/C | 8 | 117630683 | C | 0.0829 | 0.2099 |
| <b>8q23.3</b>  | rs6469654   | 8:117632965_G/C | 8 | 117632965 | G | 0.2288 | 0.0677 |
| <b>8q24.11</b> | rs117079142 | 8:117790914_C/A | 8 | 117790914 | A | 0.0432 | 0.1139 |
| <b>8q24.21</b> | rs6983267   | 8:128413305_G/T | 8 | 128413305 | G | 0.5228 | 0.1052 |
| <b>9q22.33</b> | rs34405347  | 9:101679752_T/G | 9 | 101679752 | T | 0.9034 | 0.0089 |
| <b>9p21.3</b>  | rs1537372   | 9:22103183_G/T  | 9 | 22103183  | G | 0.5692 | 0.012  |

|                 |            |                  |    |           |   |        |        |
|-----------------|------------|------------------|----|-----------|---|--------|--------|
| <b>9q31.3</b>   | rs10980628 | 9:113671403_T/C  | 9  | 113671403 | C | 0.2106 | 0.0511 |
| <b>10p14</b>    | rs12217641 | 10:8663875_C/T   | 10 | 8663875   | C | 0.6981 | 0.0069 |
| <b>10q24.2</b>  | rs10786560 | 10:101315166_G/A | 10 | 101315166 | G | 0.762  | 0.0082 |
| <b>10q22.3</b>  | rs1250567  | 10:81046265_T/C  | 10 | 81046265  | C | 0.4405 | 0.047  |
| <b>10p14</b>    | rs11255841 | 10:8739580_T/A   | 10 | 8739580   | T | 0.703  | 0.1064 |
| <b>10q11.23</b> | rs10821907 | 10:52648454_C/T  | 10 | 52648454  | C | 0.8276 | 0.073  |
| <b>10q22.3</b>  | rs704017   | 10:80819132_A/G  | 10 | 80819132  | G | 0.5846 | 0.0765 |
| <b>10q24.2</b>  | rs11190164 | 10:101351704_A/G | 10 | 101351704 | G | 0.2626 | 0.0889 |
| <b>10q25.2</b>  | rs12246635 | 10:114288619_T/C | 10 | 114288619 | C | 0.0983 | 0.0975 |
| <b>10q25.2</b>  | rs11196170 | 10:114722621_G/A | 10 | 114722621 | A | 0.2178 | 0.0527 |
| <b>11q13.4</b>  | rs7946853  | 11:74409077_T/C  | 11 | 74409077  | C | 0.8624 | 0.0119 |
| <b>11q22.1</b>  | rs55864876 | 11:100717136_G/A | 11 | 100717136 | G | 0.9184 | 0.015  |
| <b>11q22.1</b>  | rs2186607  | 11:101656397_T/A | 11 | 101656397 | T | 0.5178 | 0.0483 |
| <b>11q13.4</b>  | rs61389091 | 11:74427921_C/T  | 11 | 74427921  | C | 0.9606 | 0.1934 |
| <b>11p15.4</b>  | rs4450168  | 11:10286755_A/C  | 11 | 10286755  | C | 0.17   | 0.0413 |
| <b>11q12.2</b>  | rs174533   | 11:61549025_G/A  | 11 | 61549025  | G | 0.6739 | 0.0636 |
| <b>11q13.4</b>  | rs7121958  | 11:74280012_T/G  | 11 | 74280012  | G | 0.5105 | 0.078  |
| <b>11q23.1</b>  | rs3087967  | 11:111156836_T/C | 11 | 111156836 | T | 0.2911 | 0.1122 |
| <b>12q13.3</b>  | rs4759277  | 12:57533690_C/A  | 12 | 57533690  | A | 0.3546 | 0.0285 |
| <b>12q24.21</b> | rs1427760  | 12:115100714_T/C | 12 | 115100714 | C | 0.5268 | 0.0424 |
| <b>12p13.32</b> | rs3217874  | 12:4400808_C/T   | 12 | 4400808   | T | 0.4282 | 0.0453 |
| <b>12p13.31</b> | rs10849433 | 12:6406904_T/C   | 12 | 6406904   | C | 0.267  | 0.0468 |
| <b>12q12</b>    | rs11610543 | 12:43134191_A/G  | 12 | 43134191  | G | 0.5013 | 0.0474 |
| <b>12p13.32</b> | rs35808169 | 12:4368607_T/C   | 12 | 4368607   | C | 0.1721 | 0.089  |
| <b>12p13.32</b> | rs3217810  | 12:4388271_C/T   | 12 | 4388271   | T | 0.1253 | 0.1181 |
| <b>12p13.31</b> | rs2250430  | 12:6421174_A/T   | 12 | 6421174   | T | 0.7095 | 0.0597 |
| <b>12p11.21</b> | rs77969132 | 12:31594813_C/T  | 12 | 31594813  | T | 0.015  | 0.1583 |
| <b>12q13.12</b> | rs12372718 | 12:51171090_A/G  | 12 | 51171090  | G | 0.3924 | 0.0896 |
| <b>12q24.12</b> | rs597808   | 12:111973358_A/G | 12 | 111973358 | G | 0.5166 | 0.0737 |
| <b>12q24.21</b> | rs7300312  | 12:115890922_T/C | 12 | 115890922 | C | 0.5719 | 0.066  |
| <b>12p13.2</b>  | rs2710310  | 12:12035649_C/T  | 12 | 12035649  | C | 0.7596 | 0.0145 |

|                 |             |                  |    |           |   |        |        |
|-----------------|-------------|------------------|----|-----------|---|--------|--------|
| <b>13q22.1</b>  | rs78341008  | 13:73791554_T/C  | 13 | 73791554  | C | 0.0719 | 0.0109 |
| <b>13q34</b>    | rs8000189   | 13:111075881_C/T | 13 | 111075881 | T | 0.6401 | 0.0473 |
| <b>13q22.1</b>  | rs45597035  | 13:73649152_A/G  | 13 | 73649152  | A | 0.6506 | 0.0495 |
| <b>13q22.1</b>  | rs1924816   | 13:73997961_A/G  | 13 | 73997961  | A | 0.7737 | 0.0506 |
| <b>13q13.3</b>  | rs7333607   | 13:37462010_A/G  | 13 | 37462010  | G | 0.235  | 0.0758 |
| <b>13q22.3</b>  | rs1330889   | 13:78609615_T/C  | 13 | 78609615  | C | 0.87   | 0.0453 |
| <b>13q13.2</b>  | rs377429877 | 13:34092164_C/T  | 13 | 34092164  | C | 0.6117 | 0.0468 |
| <b>14q22.2</b>  | rs1951864   | 14:54369299_G/A  | 14 | 54369299  | A | 0.3722 | 0.0059 |
| <b>14q23.1</b>  | rs17094983  | 14:59189361_G/A  | 14 | 59189361  | G | 0.8773 | 0.0062 |
| <b>14q23.1</b>  | rs8020436   | 14:59208437_G/A  | 14 | 59208437  | A | 0.4016 | 0.0294 |
| <b>14q22.2</b>  | rs35107139  | 14:54419106_A/C  | 14 | 54419106  | C | 0.4235 | 0.0912 |
| <b>14q22.2</b>  | rs4901473   | 14:54445157_G/A  | 14 | 54445157  | G | 0.378  | 0.0465 |
| <b>15q23</b>    | rs745213    | 15:68060389_T/G  | 15 | 68060389  | G | 0.8102 | 0.0072 |
| <b>15q22.31</b> | rs12594720  | 15:67007018_C/G  | 15 | 67007018  | C | 0.7218 | 0.0246 |
| <b>15q22.33</b> | rs56324967  | 15:67402824_T/C  | 15 | 67402824  | C | 0.6757 | 0.0689 |
| <b>15q13.3</b>  | rs17816465  | 15:33156386_G/A  | 15 | 33156386  | A | 0.2055 | 0.069  |
| <b>15q13.3</b>  | rs12708491  | 15:32992836_G/A  | 15 | 32992836  | G | 0.5872 | 0.0464 |
| <b>15q13.3</b>  | rs2293581   | 15:33010736_G/A  | 15 | 33010736  | A | 0.2116 | 0.1248 |
| <b>15q26.1</b>  | rs7495132   | 15:91172901_C/T  | 15 | 91172901  | T | 0.12   | 0.0453 |
| <b>16q23.2</b>  | rs9930005   | 16:80043258_C/A  | 16 | 80043258  | C | 0.4303 | 0.0061 |
| <b>16q24.1</b>  | rs12447408  | 16:86252544_G/A  | 16 | 86252544  | A | 0.2535 | 0.0079 |
| <b>16q22.1</b>  | rs9924886   | 16:68743939_A/C  | 16 | 68743939  | A | 0.7321 | 0.055  |
| <b>16q24.1</b>  | rs12149163  | 16:86339315_T/C  | 16 | 86339315  | T | 0.4976 | 0.0487 |
| <b>16q24.1</b>  | rs62042090  | 16:86703949_C/T  | 16 | 86703949  | T | 0.2164 | 0.0481 |
| <b>17q24.3</b>  | rs983318    | 17:70413253_G/A  | 17 | 70413253  | A | 0.2526 | 0.0397 |
| <b>17p13.3</b>  | rs73975586  | 17:814243_A/T    | 17 | 814243    | A | 0.8732 | 0.0497 |
| <b>17p12</b>    | rs1078643   | 17:10707241_G/A  | 17 | 10707241  | A | 0.7636 | 0.0747 |
| <b>17q25.3</b>  | rs75954926  | 17:81061048_A/G  | 17 | 81061048  | G | 0.6568 | 0.0882 |
| <b>17q25.3</b>  | rs373585858 | 17:80394556_G/A  | 17 | 80394556  | A | 0.0016 | 0.1103 |
| <b>17p13.3</b>  | rs4968127   | 17:809643_G/A    | 17 | 809643    | G | 0.3684 | 0.0514 |
| <b>18q21.1</b>  | rs11874392  | 18:46453156_A/T  | 18 | 46453156  | A | 0.545  | 0.1606 |

|                 |             |                 |    |          |   |        |        |
|-----------------|-------------|-----------------|----|----------|---|--------|--------|
| <b>19q13.43</b> | rs73068325  | 19:59079096_C/T | 19 | 59079096 | T | 0.1826 | 0.0066 |
| <b>19p13.11</b> | rs34797592  | 19:16417198_C/T | 19 | 16417198 | T | 0.1182 | 0.0824 |
| <b>19q13.11</b> | rs28840750  | 19:33519927_T/G | 19 | 33519927 | T | 0.948  | 0.1939 |
| <b>19q13.2</b>  | rs1963413   | 19:41871573_G/A | 19 | 41871573 | A | 0.6119 | 0.0441 |
| <b>19q13.33</b> | rs12979278  | 19:49218602_C/T | 19 | 49218602 | T | 0.53   | 0.0293 |
| <b>20q13.33</b> | rs2738783   | 20:62308612_T/G | 20 | 62308612 | T | 0.2029 | 0.006  |
| <b>20q13.13</b> | rs6067417   | 20:48983697_C/T | 20 | 48983697 | C | 0.5635 | 0.0331 |
| <b>20q13.12</b> | rs6031311   | 20:42666475_C/T | 20 | 42666475 | T | 0.7591 | 0.0362 |
| <b>20q13.13</b> | rs6091189   | 20:49256285_C/T | 20 | 49256285 | T | 0.1529 | 0.0549 |
| <b>20p12.3</b>  | rs994308    | 20:6603622_C/T  | 20 | 6603622  | C | 0.5939 | 0.0626 |
| <b>20p12.3</b>  | rs28488     | 20:6762221_C/T  | 20 | 6762221  | T | 0.6388 | 0.0714 |
| <b>20p12.3</b>  | rs556532366 | 20:8568071_C/T  | 20 | 8568071  | T | 0.0029 | 0.0715 |
| <b>20p12.3</b>  | rs189583    | 20:6376457_G/C  | 20 | 6376457  | G | 0.3298 | 0.0795 |
| <b>20p12.3</b>  | rs4813802   | 20:6699595_T/G  | 20 | 6699595  | G | 0.3561 | 0.0819 |
| <b>20p12.3</b>  | rs11087784  | 20:7740976_A/G  | 20 | 7740976  | G | 0.1523 | 0.0874 |
| <b>20q13.13</b> | rs6066825   | 20:47340117_A/G | 20 | 47340117 | A | 0.6448 | 0.0719 |
| <b>20q13.13</b> | rs6063514   | 20:49055318_C/T | 20 | 49055318 | C | 0.6086 | 0.0547 |
| <b>20q13.32</b> | rs13831     | 20:57475191_A/G | 20 | 57475191 | G | 0.684  | 0.0334 |
| <b>20q13.33</b> | rs1741640   | 20:60932414_T/C | 20 | 60932414 | C | 0.7652 | 0.1146 |
| <b>20q11.22</b> | rs6058093   | 20:33213196_A/C | 20 | 33213196 | C | 0.4942 | 0.045  |

Supplemental Table S4a. Surrogate loci and their association with colorectal cancer in European-ancestry population

| <b>Reference Variant</b> | <b>Surrogate Variant</b> | <b>Risk Allele</b> | <b>BETA</b> | <b>RAF</b> | <b>R2</b> |
|--------------------------|--------------------------|--------------------|-------------|------------|-----------|
| <b>5:112097351_A/G</b>   | 5:112436261_C/T          | T                  | 0.5477      | 0.0026     | 0.4027    |
| <b>17:80394556_G/A</b>   | 17:80364244_C/T          | T                  | 0.1643      | 0.0043     | 1         |
| <b>20:8568071_C/T</b>    | 20: 9549539_G/T          | T                  | 0.0941      | 0.0015     | 0.4494    |
