# Supplementary material
Source: PubMed Central journal article supplement (PMC9992158)
Supplement: NIHMS1865511-supplement-6.pdf [file NIHMS1865511-supplement-6.pdf]

Supplemental Table S5. Sex-specific estimates of log(odds ratio) of risk factors in the proposed model. We presented estimates (log(OR)), standard errors (SE), and P-values of risk factors in the proposed model, including family history, endoscopy history, and PRS, obtained from GECCO and CORECT cohort-based nested case-control studies.

| <b>Sex</b>   | <b>Risk Factor</b>      | <b>log(OR)</b> | <b>SE</b> | <b>P-value</b> |
|--------------|-------------------------|----------------|-----------|----------------|
| <b>Women</b> | Family history (Yes)    | 0.26           | 0.08      | 6.18e-4        |
|              | Endoscopy history (Yes) | -0.18          | 0.06      | 3.09e-3        |
|              | PRS (10%)               | 0.10           | 7.1e-3    | 2.03e-82       |
| <b>Men</b>   | Family history (Yes)    | 0.22           | 0.12      | 0.06           |
|              | Endoscopy (Yes)         | -0.33          | 0.10      | 7.90e-4        |
|              | PRS (10%)               | 0.20           | 7.99e-3   | 2.79e-80       |
