# Supplementary material
Source: PubMed Central journal article supplement (PMC9992158)
Supplement: NIHMS1865511-supplement-7.pdf [file NIHMS1865511-supplement-7.pdf]

Supplemental Table S6. 10-year E/O CRC case ratio in the GERA European-ancestral participants. We demonstrated the comparison of expected (E) and observed (O) CRC cases based on the PRS-enhanced model (including age, first-degree CRC family history, sex, endoscopy history and polygenic risk score) in the 10-year follow-up via E/O ratio and the corresponding 95% confidence intervals in GERA European ancestry participants. The number of expected cases was calculated based on age, first-degree CRC family history, sex, endoscopy history and polygenic risk score (PRS); The number of observed cases was based on diagnosed cases in the cohort.

| <b>Stratum</b>                                                                                   | <b>E</b> | <b>O</b> | <b>E/O (95% CI)</b> |
|--------------------------------------------------------------------------------------------------|----------|----------|---------------------|
| Overall                                                                                          | 519.33   | 519      | 1.00 (0.92, 1.09)   |
| <b>Age at study entry, years</b>                                                                 |          |          |                     |
| 40-49                                                                                            | 27.10    | 19       | 1.43 (0.91, 2.24)   |
| 50-59                                                                                            | 88.30    | 62       | 1.42 (1.11, 1.83)   |
| >=60                                                                                             | 403.93   | 438      | 0.92 (0.84, 1.01)   |
| <b>First-degree CRC family History<sup>a</sup></b>                                               |          |          |                     |
| Negative                                                                                         | 467.05   | 451      | 1.04 (0.94, 1.14)   |
| Positive                                                                                         | 52.28    | 68       | 0.77 (0.61, 0.98)   |
| <b>Sex</b>                                                                                       |          |          |                     |
| Women                                                                                            | 269.29   | 293      | 0.92 (0.82, 1.03)   |
| Men                                                                                              | 250.04   | 226      | 1.11 (0.97, 1.26)   |
| <b>Endoscopy history<sup>b</sup></b>                                                             |          |          |                     |
| No                                                                                               | 231.61   | 238      | 0.97 (0.86, 1.10)   |
| Yes                                                                                              | 287.72   | 281      | 1.02 (0.91, 1.15)   |
| a. Family history of ascertained from study survey questionnaires and electronic health records. |          |          |                     |
| b. Endoscopy history within 10 years prior to study entry.                                       |          |          |                     |
