# Supplementary material
Source: PubMed Central journal article supplement (PMC9992158)
Supplement: NIHMS1865511-supplement-8.pdf [file NIHMS1865511-supplement-8.pdf]

Supplemental Table S7. 10-year time-dependent AUC estimates of the PRS-enhanced model in the GERA European-ancestral participants. We presented time-dependent AUC estimates (95% confidence interval) of predicted 10-year absolute risk based on the PRS-enhanced model in GERA European ancestry participants. AUC estimates are based on the model including age, first-degree CRC family history, sex, endoscopy history and polygenic risk score (PRS).

| <b>Stratum</b>                         | <b>AUC</b>        | <b>Difference to the lowest AUC in each stratification (95% CI)</b> |
|----------------------------------------|-------------------|---------------------------------------------------------------------|
| Overall                                | 0.72 (0.7, 0.74)  | Not available                                                       |
| <b>Age at study entry, years</b>       |                   |                                                                     |
| 40-49                                  | 0.79 (0.73, 0.85) | 15% (9%, 21%)                                                       |
| 50-59                                  | 0.72 (0.68, 0.76) | 8% (3%, 13%)                                                        |
| >=60                                   | 0.64 (0.62, 0.67) | Reference                                                           |
| <b>First-degree CRC family History</b> |                   |                                                                     |
| Negative                               | 0.72 (0.7, 0.74)  | Reference                                                           |
| Positive                               | 0.73 (0.66, 0.79) | 1% (-6%, 8%)                                                        |
| <b>Sex</b>                             |                   |                                                                     |
| Women                                  | 0.73 (0.7, 0.76)  | 2% (-2%, 6%)                                                        |
| Men                                    | 0.71 (0.68, 0.74) | Reference                                                           |
| <b>Endoscopy history</b>               |                   |                                                                     |
| No                                     | 0.73 (0.7, 0.76)  | 1% (-3%, 6%)                                                        |
| Yes                                    | 0.72 (0.69, 0.74) | Reference                                                           |
