# Supplementary material
Source: PubMed Central journal article supplement (PMC9992158)
Supplement: NIHMS1865511-supplement-9.pdf [file NIHMS1865511-supplement-9.pdf]

Supplemental Table S8. Sequential model comparison using 10-year time-dependent AUC in the GERA European-ancestral participants. We compared time-dependent AUCs of 10-year absolute risks based on Model 1 (age and first-degree CRC family history) and Model 2 (age, first-degree CRC family history, sex and endoscopy history) with the proposed model (age, first-degree CRC family history, sex, endoscopy history, and polygenic risk score) in GERA European ancestry participants.

| <b>Model</b>                                                                                      | <b>AUC</b> | <b>P-value<sup>a</sup></b> |
|---------------------------------------------------------------------------------------------------|------------|----------------------------|
| <b>All participants eligible for screening with age<sup>b</sup> 45-74 years</b>                   |            |                            |
| Model 1                                                                                           | 0.664      | 0.004                      |
| Model 2                                                                                           | 0.659      | 0.001                      |
| Proposed model                                                                                    | 0.702      | Reference                  |
| <b>All participants with age<sup>b</sup> 40-49 years and no endoscopy history</b>                 |            |                            |
| Model 1                                                                                           | 0.70       | 0.24                       |
| Model 2                                                                                           | 0.75       | 0.65                       |
| Proposed model                                                                                    | 0.79       | Reference                  |
| <b>All European participants</b>                                                                  |            |                            |
| Model 1                                                                                           | 0.70       | 0.05                       |
| Model 2                                                                                           | 0.71       | 0.03                       |
| Proposed model                                                                                    | 0.72       | Reference                  |
| a. P-value for comparing the AUC estimates of a reduced model to the proposed PRS-enhanced model. |            |                            |
| b. Age at study entry.                                                                            |            |                            |
