# Supplementary material
Source: PubMed Central journal article supplement (PMC9992158)
Supplement: NIHMS1865511-supplement-10.pdf [file NIHMS1865511-supplement-10.pdf]

Supplemental Table S9. Predictive value of endoscopy history in GERA. We compared time-dependent AUCs of 5- and 10-year absolute risks based on a model with age, first-degree CRC family history, and sex to Model 2 (age, first-degree CRC family history, sex and endoscopy history) in GERA European ancestry participants.

| <b>Model</b>                                                        | <b>5-year AUC</b> | <b>10-year AUC</b> |
|---------------------------------------------------------------------|-------------------|--------------------|
| <b>All participants eligible for screening with age 45-74 years</b> |                   |                    |
| Age, family history, sex                                            | 0.633             | 0.649              |
| Age, family history, sex, endoscopy history                         | 0.636             | 0.659              |
| <b>All participants with age 40-49 years</b>                        |                   |                    |
| Age, family history, sex                                            | 0.623             | 0.745              |
| Age, family history, sex, endoscopy history                         | 0.639             | 0.766              |
| <b>All European participants</b>                                    |                   |                    |
| Age, family history, sex                                            | 0.706             | 0.699              |
| Age, family history, sex, endoscopy history                         | 0.706             | 0.704              |
