# Supplementary material
Source: PubMed Central journal article supplement (PMC9992158)

Supplemental Figure S1. Calibration plot on 10-year absolute risk based on the PRS-enhanced model stratified by deciles of predicted risk in GERA European-ancestral participants. The x-axis presents the predicted average absolute risk values by deciles of risk. The y-axis presents the observed average absolute risks by deciles of risk, along with their 95% CIs shown as vertical error bars if there were cases developed in the follow-up period. The assessment of the risk model in each decile is determined by whether the decile-specific 95% CI covers the dotted 45-degree line.

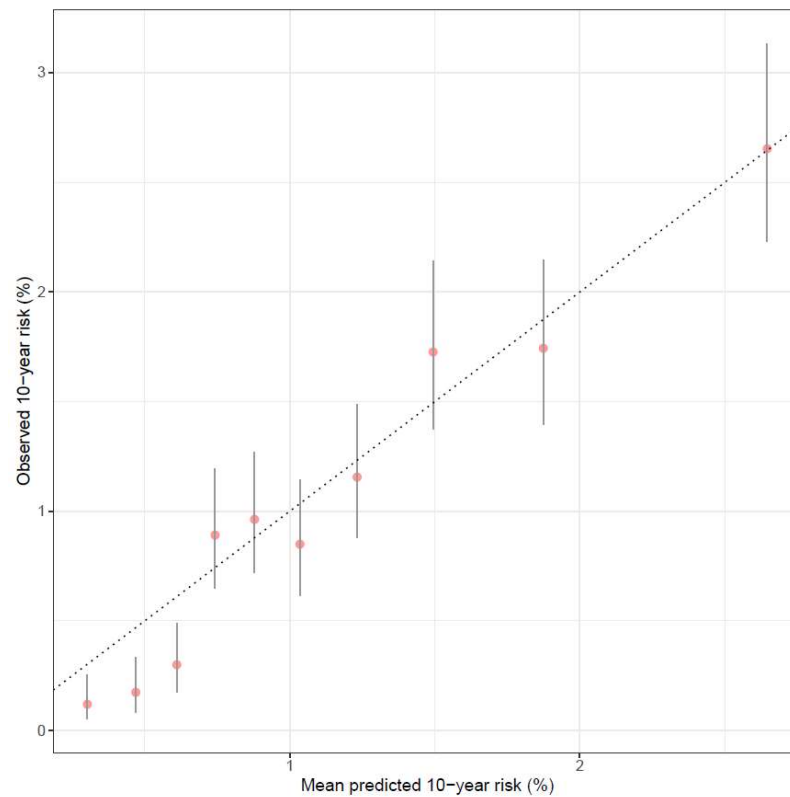

Supplement: NIHMS1865511-supplement-11.pdf [file NIHMS1865511-supplement-11.pdf]
