# Supplementary material
Source: PubMed Central journal article supplement (PMC9992158)

Supplemental Figure S2. Sex-stratified calibration plots on 5- and 10-year absolute risks based on the PRS-enhanced model stratified by deciles of predicted risk. The x-axis is the predicted average risk values in individual deciles. The y-axis is the observed average risks within individual deciles, along with their 95% CIs shown as vertical error bars if there were cases developed in the t-year follow-up period. The assessment of the risk model in each risk decile is determined by whether the decile-specific 95% CI covers the dotted 45-degree line.

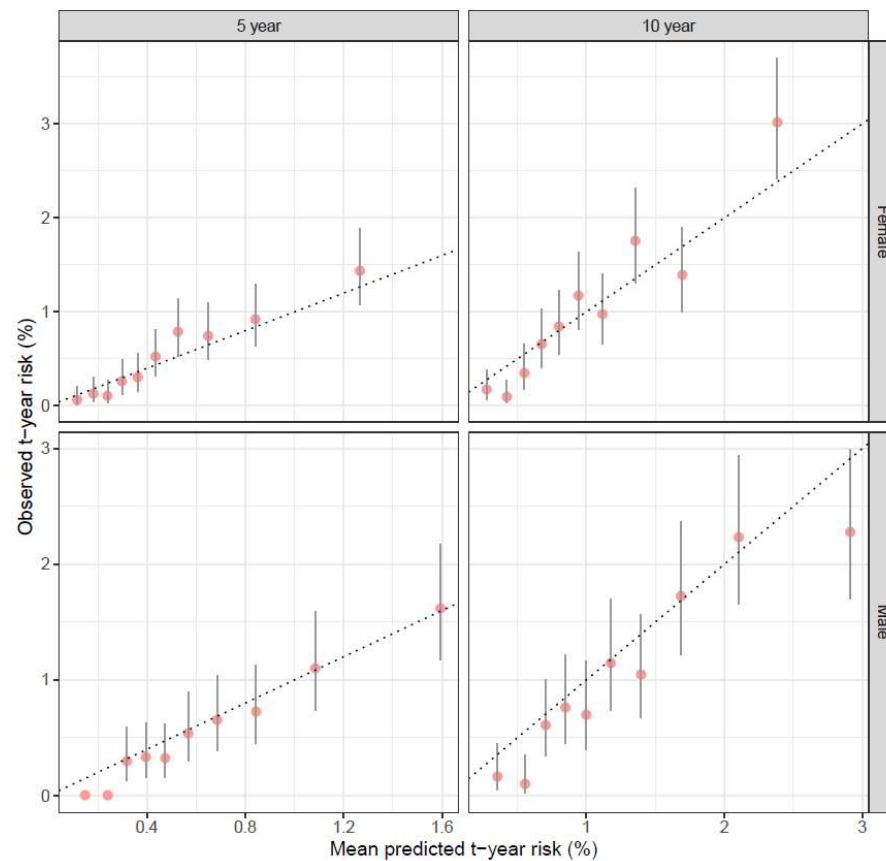

Supplement: NIHMS1865511-supplement-12.pdf [file NIHMS1865511-supplement-12.pdf]
