# Supplementary material
Source: PubMed Central journal article supplement (PMC9992158)

Supplemental Figure S6. Calibration plots on the relative risk (RR) of PRS stratified by 7 equally sized groups based on the PRS in African American, Asian, European ancestry, and Latinx groups in the GERA cohort. The x-axis is the log-transformed predicted RR values and the y-axis is the log-transformed observed RR with the middle bin as the reference group. The calibration of the PRS RR in each bin is determined by whether the bin-specific 95% CI (vertical error bars) covers the dotted 45-degree line. There were 25, 34, 536 and 27 CRC cases among African American, Asian, European-ancestry, and Latinx participants, respectively. The corresponding Pearson correlation coefficients of the log-transformed predicted and observed RRs were 0.62, 0.38, 0.98 and 0.03, respectively.

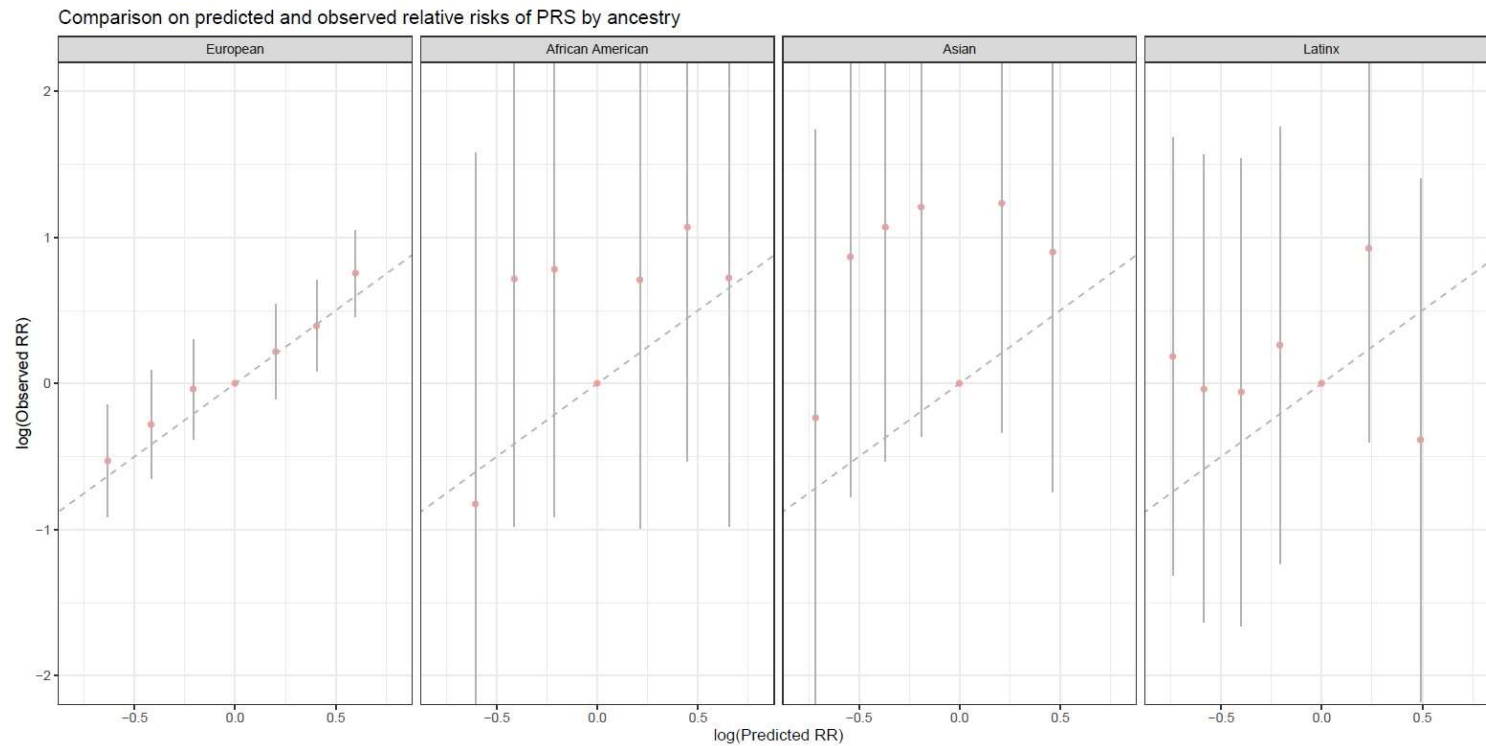

Supplement: NIHMS1865511-supplement-16.pdf [file NIHMS1865511-supplement-16.pdf]
