# Supplementary material
Source: PubMed Central journal article supplement (PMC9992158)

Supplemental Figure S7. Sex-specific estimated baseline incidence rate of CRC based on SEER18 (2007-2015) CRC rate in European population.

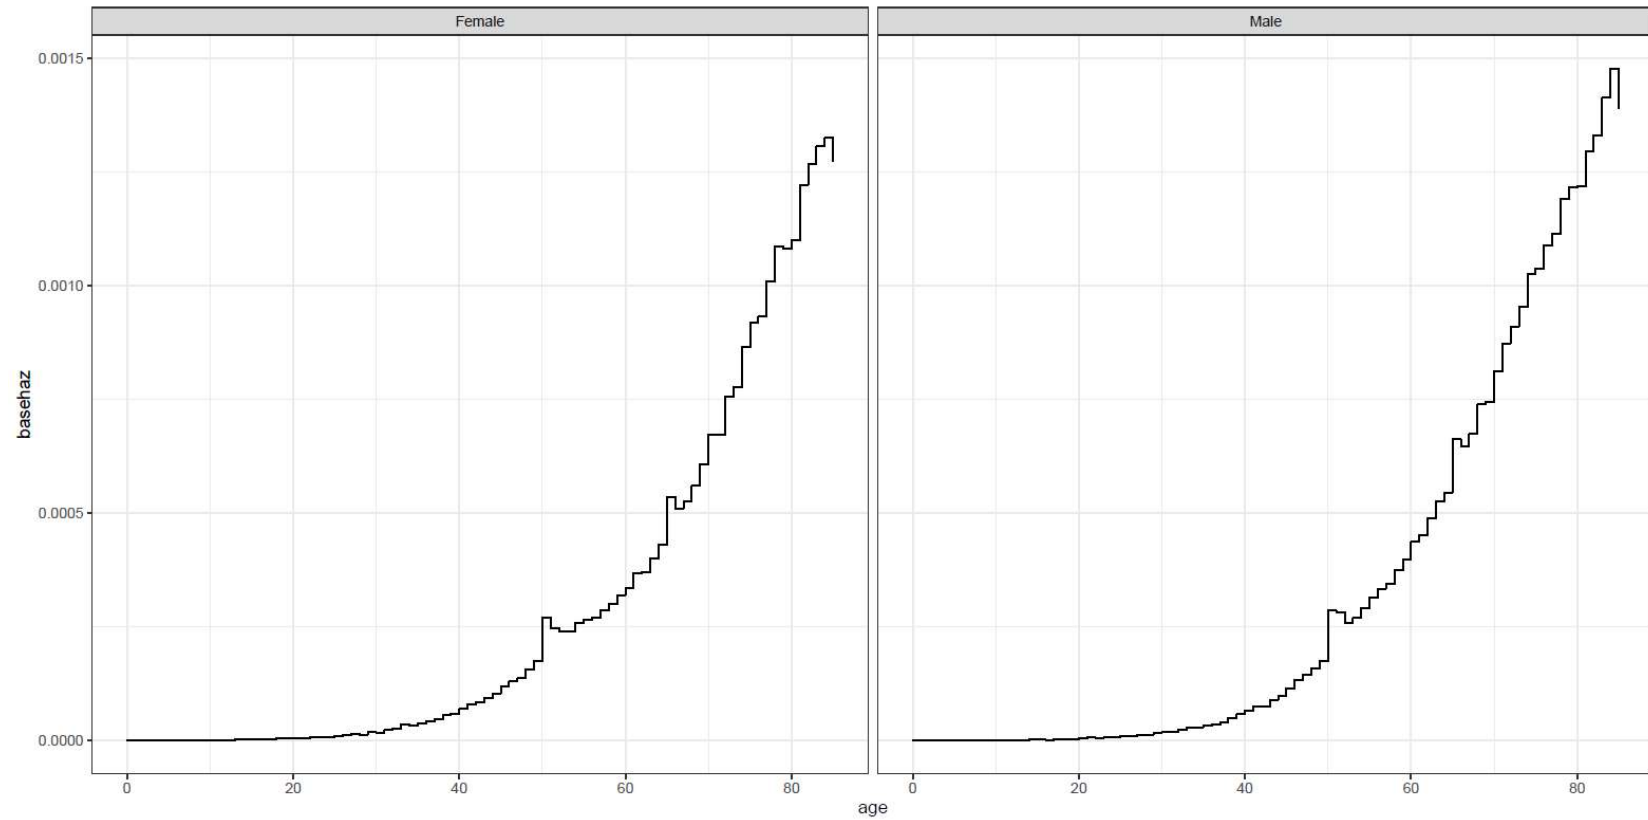

Supplement: NIHMS1865511-supplement-17.pdf [file NIHMS1865511-supplement-17.pdf]
